# Supplementary material for: Ultrathin metal–organic framework nanosheets as building blocks of lamellar nanofilms for ultrafast molecular sieving
Source: Royal Society of Chemistry journal article supplement (doi:10.1039/d2nr05229f), 2022-01-01
Supplement: d2nr05229f1.pdf [file d2nr05229f1.pdf]

## Supporting Information

# Ultrathin Metal-Organic Framework Nanosheets as Building Blocks of Lamellar Nanofilms for Ultrafast Molecular Sieving

*Guitu Wang<sup>a</sup>, Jingyu Lu<sup>a</sup>, Chuanjie Fang<sup>a\*</sup>, Wenzhang Fang<sup>a</sup>, Xinsheng Peng<sup>b</sup>, Hongbo Zeng<sup>c</sup>, Liping Zhu<sup>a\*</sup>*

<sup>a</sup> Guitu Wang, Jingyu Lu, Chuanjie Fang\*, Prof. Liping Zhu\*

MOE Key Laboratory of Macromolecular Synthesis and Functionalization, Department of Polymer Science and Engineering, Zhejiang University, Hangzhou 310027, PR. China.

E-mail: fangchuanjie@zju.edu.cn, lpzhu@zju.edu.cn

<sup>b</sup> Prof. Xinsheng Peng

State Key Laboratory of Silicon Materials School of Materials Science and Engineering, Zhejiang University, Hangzhou 310027, PR. China.

<sup>c</sup> Prof. Hongbo Zeng

Department of Chemical and Materials Engineering, University of Alberta, Edmonton, T6G 1H9, Alberta, Canada.

## Figures and Tables

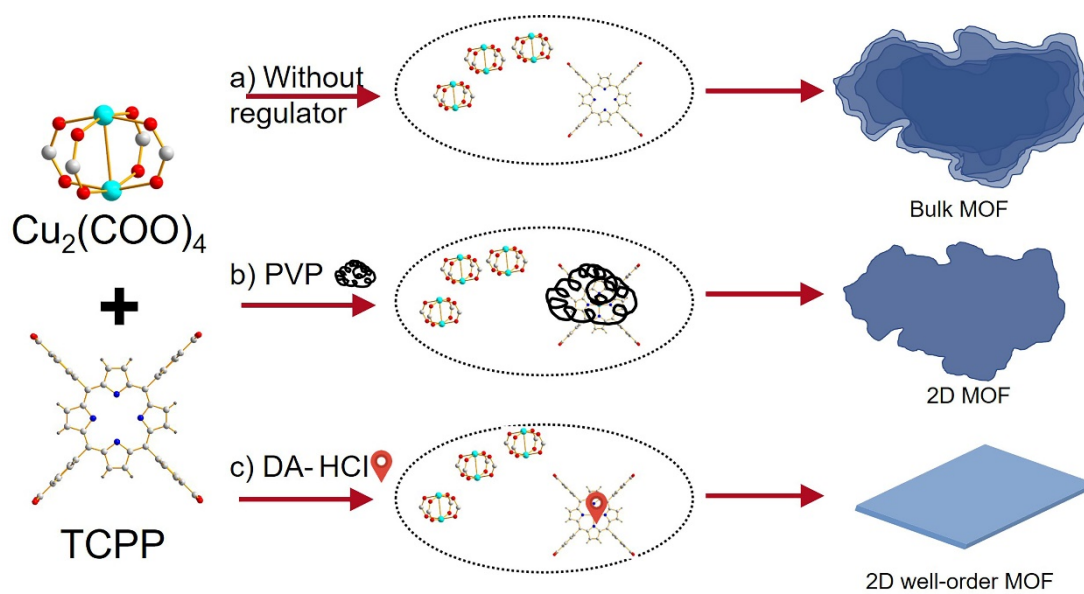

**Figure S1.** Synthesis illustration of bulk, nanosheets, and well-order nanosheets.

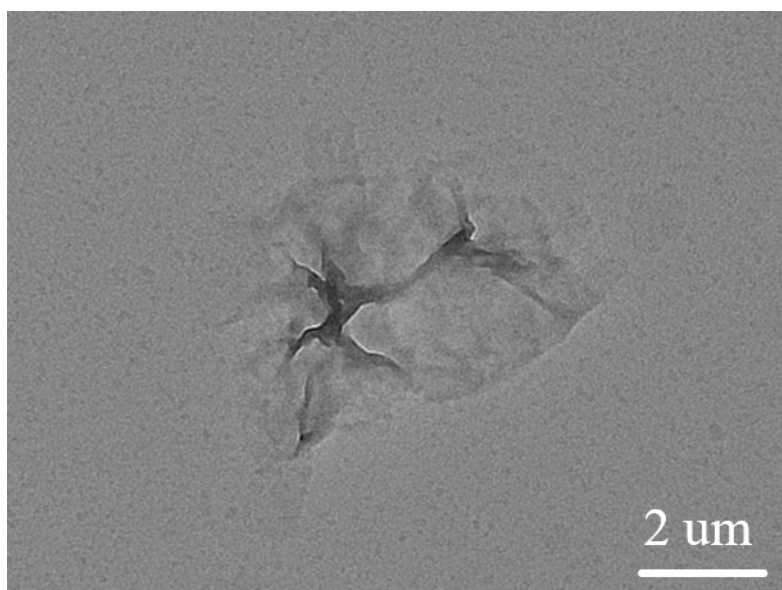

**Figure S2.** TEM image of the Cu-TCPP-PVP.

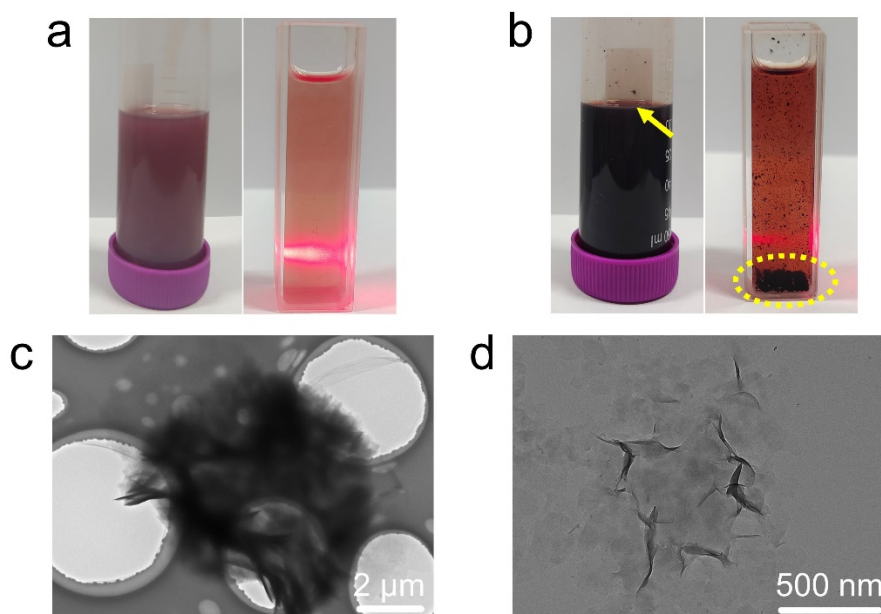

**Figure S3.** Digital photos and Tyndall effect of Cu-TCPP prepared by a) HCl and b) DA. TEM images of Cu-TCPP prepared by c) HCl and d) DA.

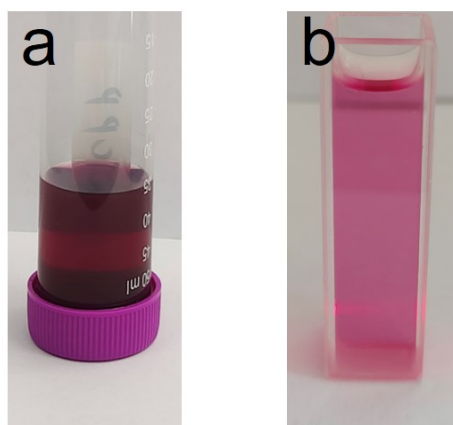

**Figure S4.** a) Digital photos and b) Tyndall effect of TCPP solutions.

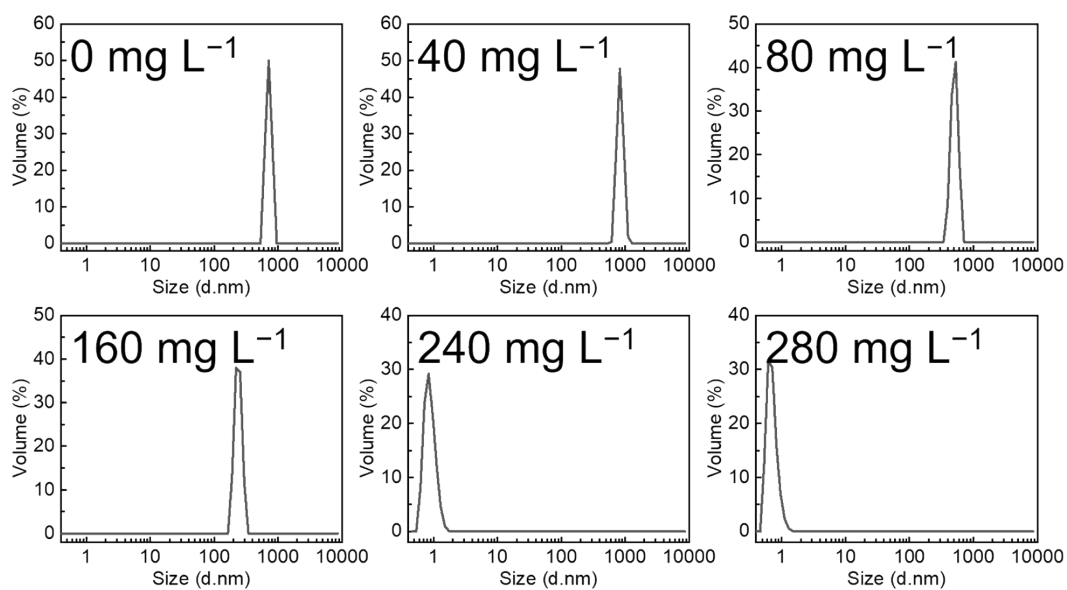

**Figure S5.** Size distribution of the solution after the reaction with different addition amounts of DA solution.

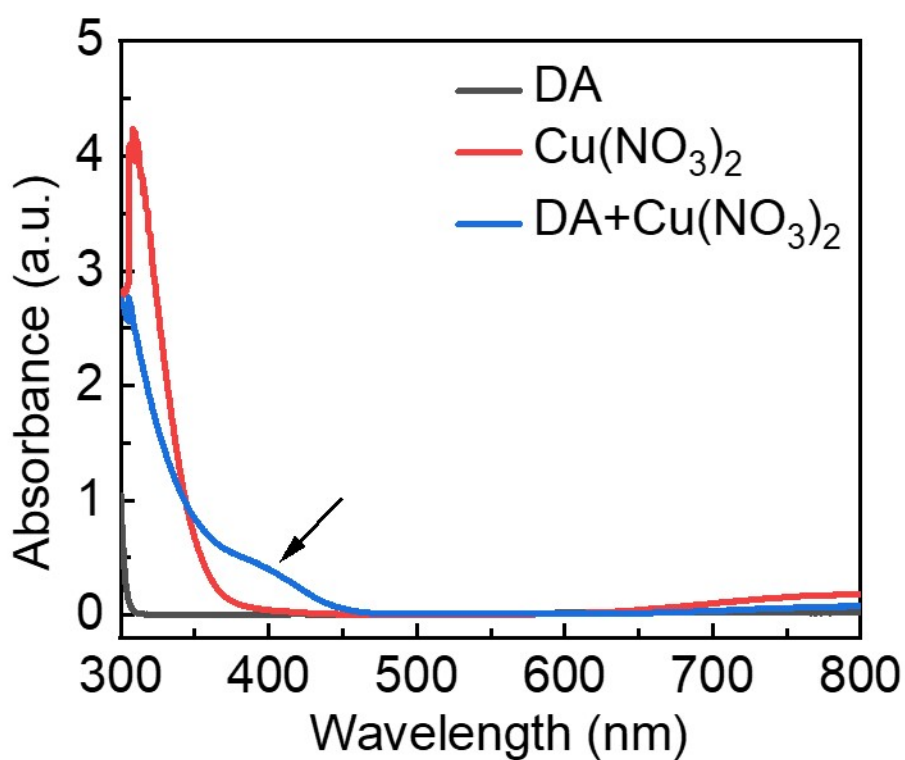

**Figure S6.** UV-vis absorption spectra of DA, Cu(NO<sub>3</sub>)<sub>2</sub> and DA + Cu(NO<sub>3</sub>)<sub>2</sub>.

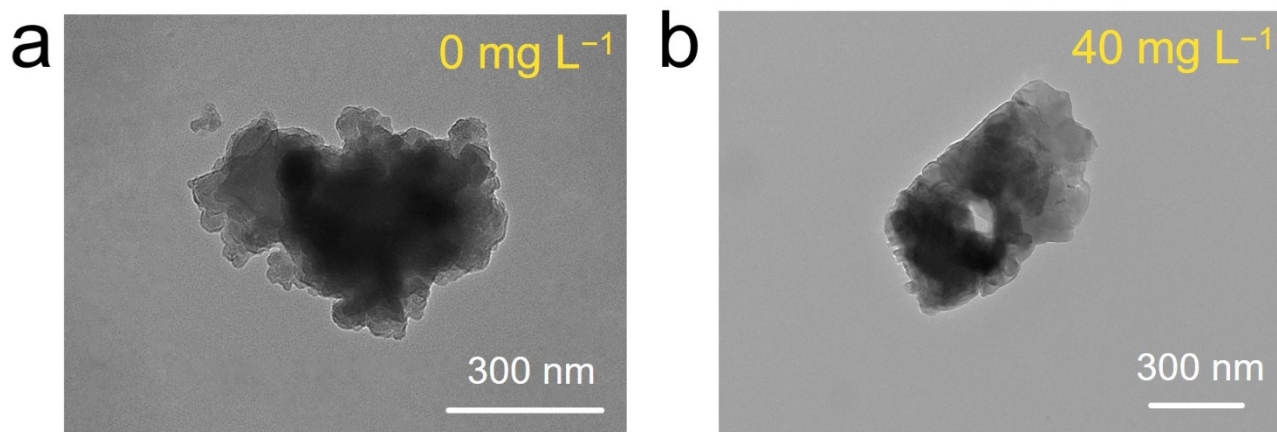

**Figure S7.** TEM images of Cu-TCPP MOFs prepared with a) 0 mg L<sup>-1</sup> and b) 40 mg L<sup>-1</sup> DA-HCl.

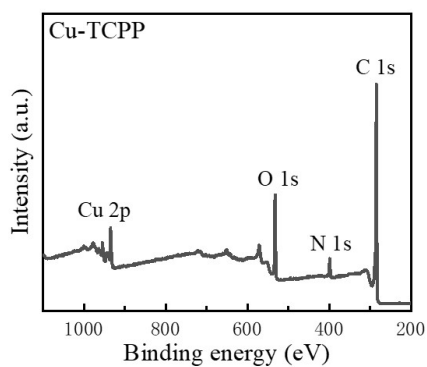

| Element | Atomic (%) |
|---------|------------|
| C 1s    | 77.3       |
| N 1s    | 5.4        |
| O 1s    | 14.6       |
| Cu 2p   | 2.7        |

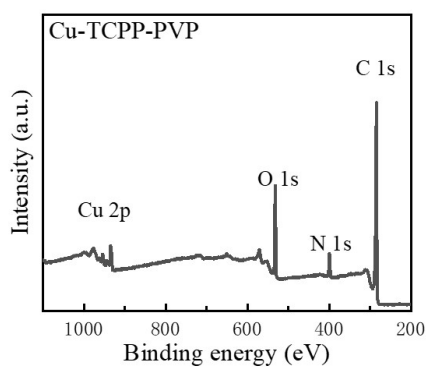

| Element | Atomic (%) |
|---------|------------|
| C 1s    | 76.0       |
| N 1s    | 7.2        |
| O 1s    | 15.0       |
| Cu 2p   | 1.8        |

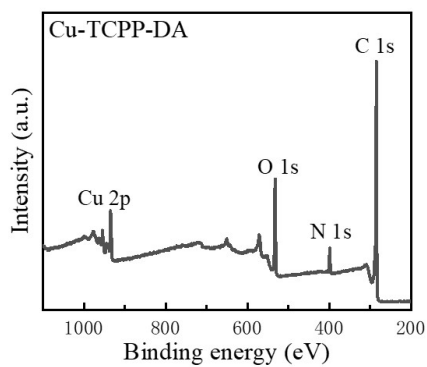

| Element | Atomic (%) |
|---------|------------|
| C 1s    | 77.0       |
| N 1s    | 5.4        |
| O 1s    | 14.6       |
| Cu 2p   | 3.0        |

**Figure S8.** XPS wide spectra of Cu-TCPP, Cu-TCPP-PVP, and Cu-TCPP-DA MOFs with their elemental composition.

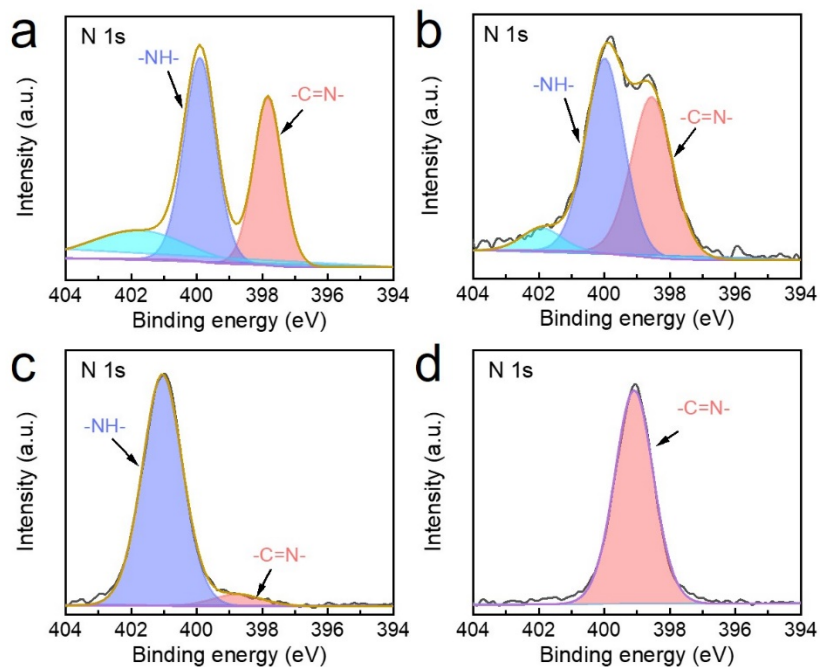

**Figure S9.** XPS N 1s spectra of a) TCPP, b) Cu-TCPP-PVP, c) DA and d) PVP.

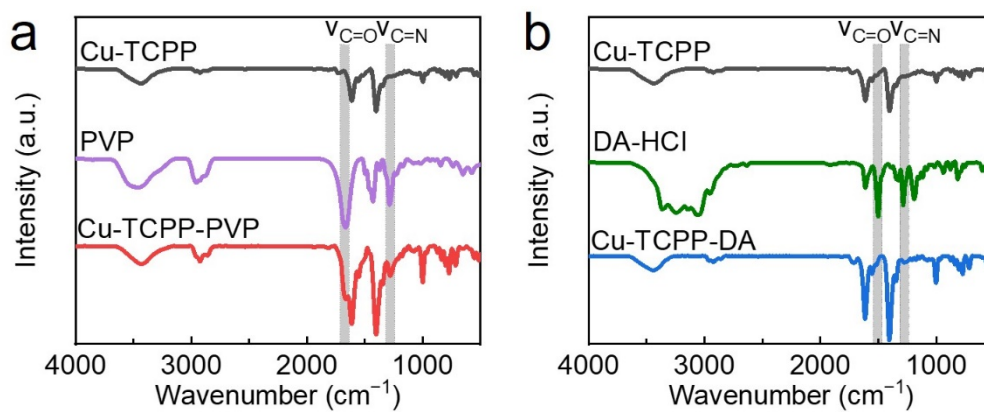

**Figure S10.** a) FTIR spectra of Cu-TCPP, PVP and Cu-TCPP-PVP. b) FTIR spectra of Cu-TCPP, DA-HCl and Cu-TCPP-DA.

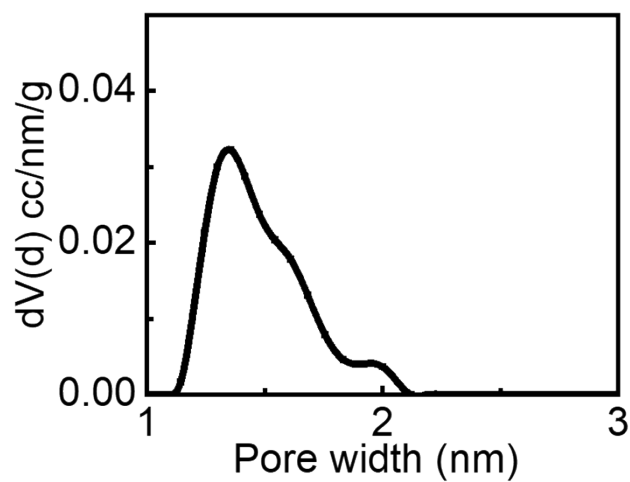

**Figure S11.** Pore size distribution plot of the Cu-TCPP-DA nanosheets determined by BET test.

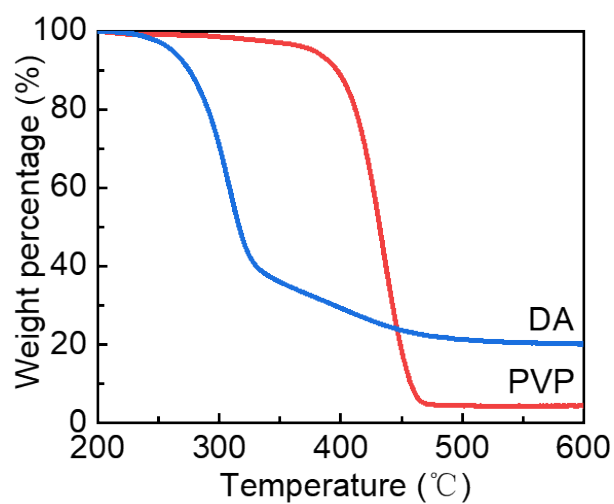

**Figure S12.** TGA spectra of DA and PVP.

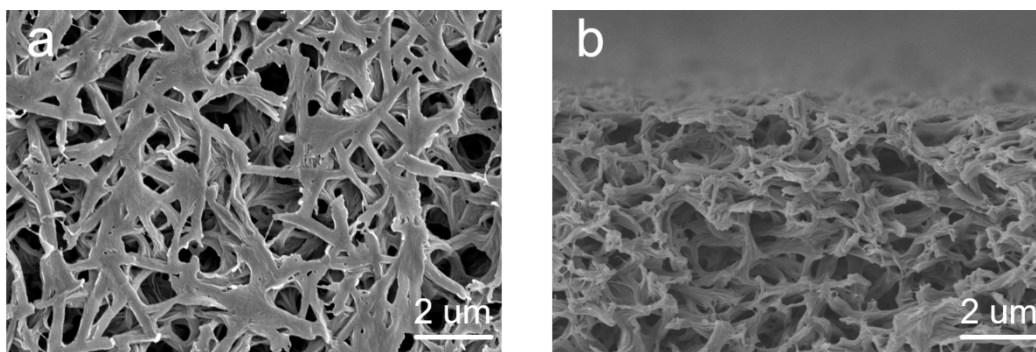

**Figure S13.** Surface and cross-sectional SEM images of the nylon support.



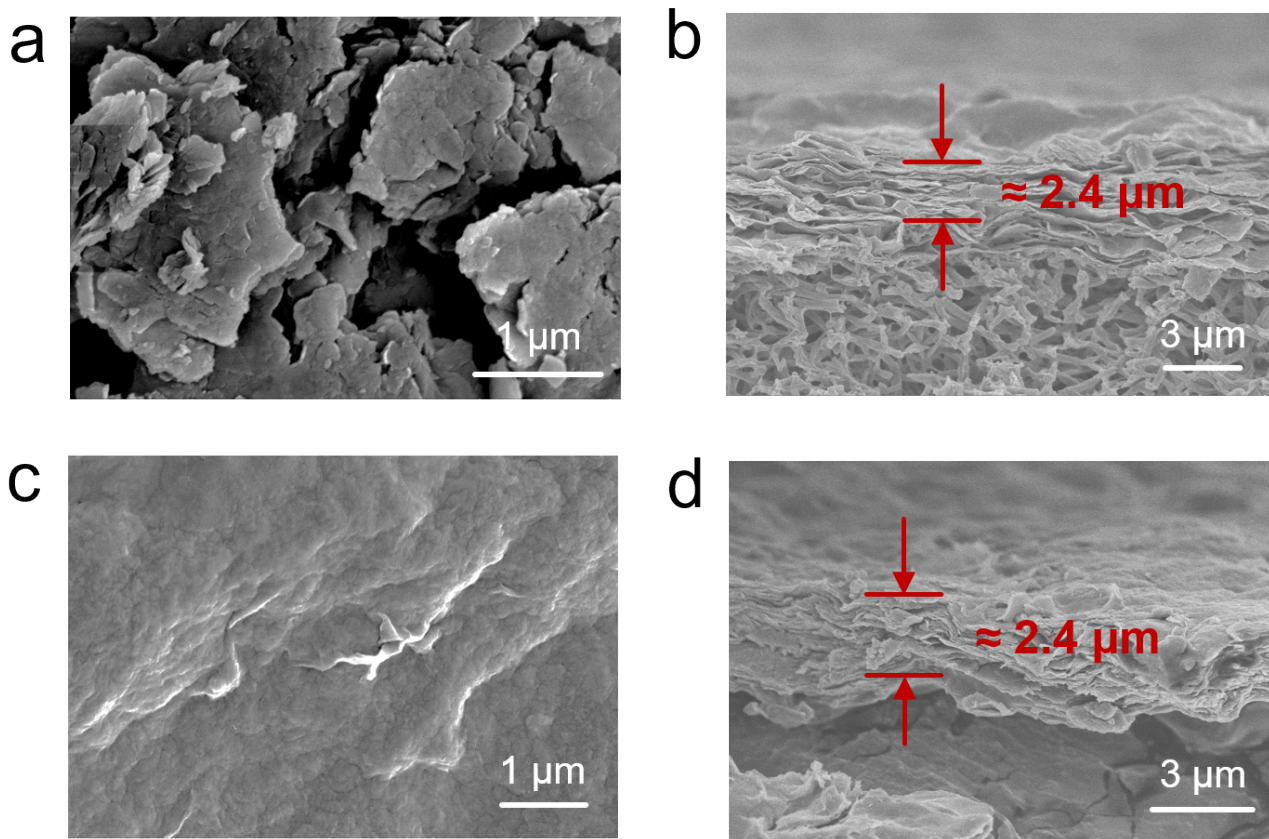

**Figure S14.** Surface SEM images of a) Cu-TCPP and c) Cu-TCPP-PVP membranes. Cross-sectional SEM images of b) Cu-TCPP and d) Cu-TCPP-PVP membranes.

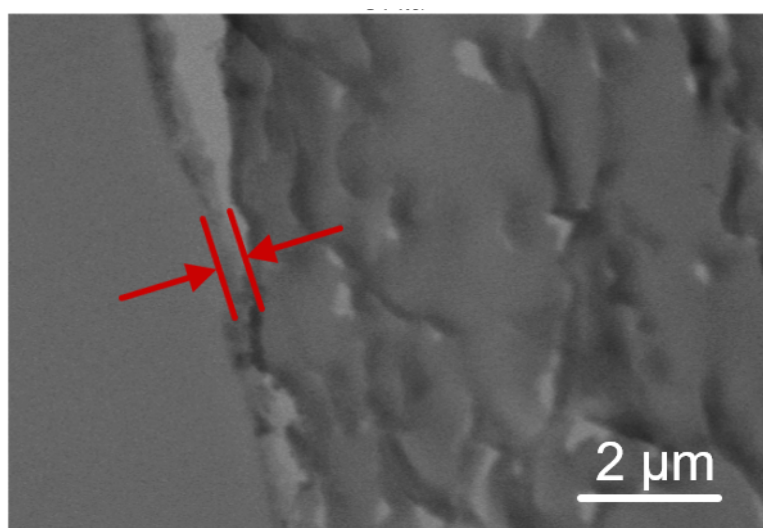

**Figure S15.** Cross-sectional TEM image of Cu-TCPP-DA membrane.



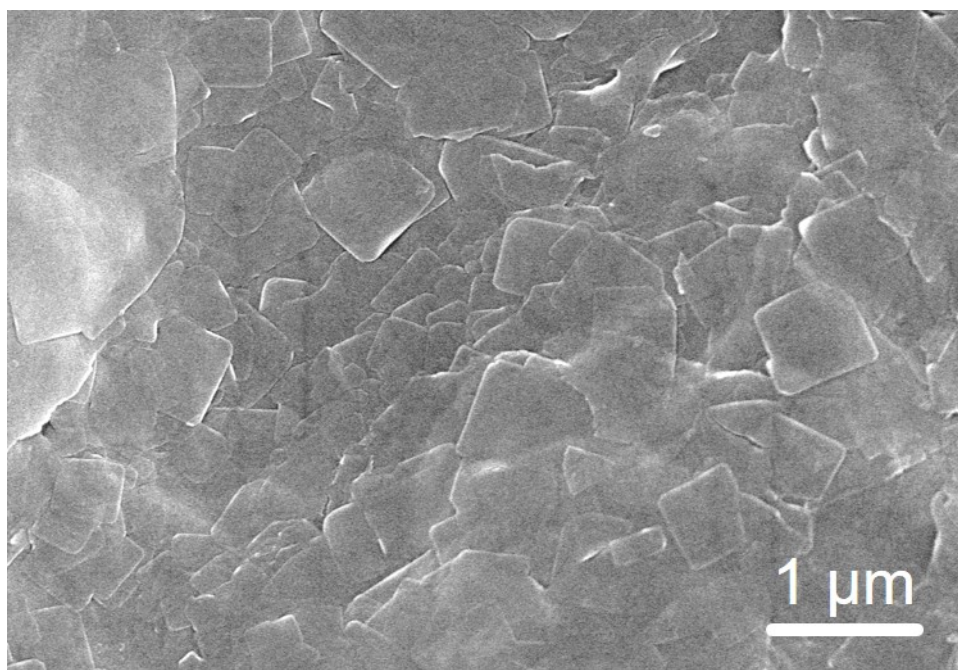

**Figure S16.** Surface SEM image of the Cu-TCPP-DA membrane after the soaking in water for 30 days.

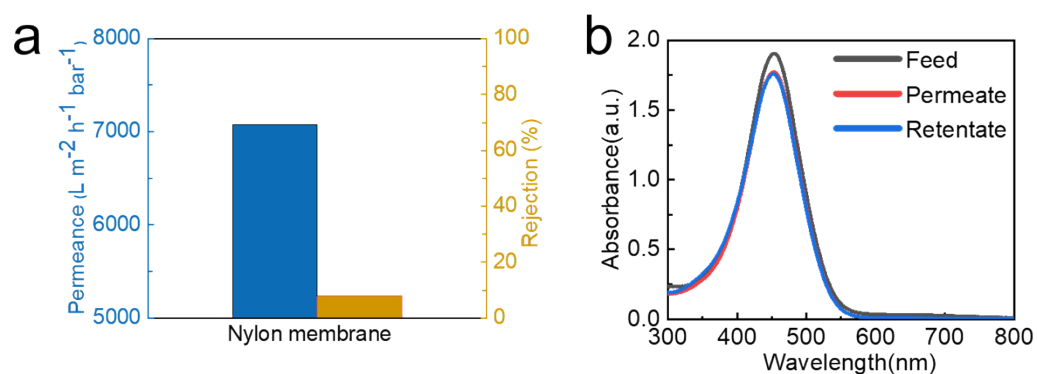

**Figure S17.** a) Water permeance and rejection of basic orange 2 through the nylon support. b) UV-vis absorption spectra of basic orange 2 solutions before and after filtration through the nylon support.

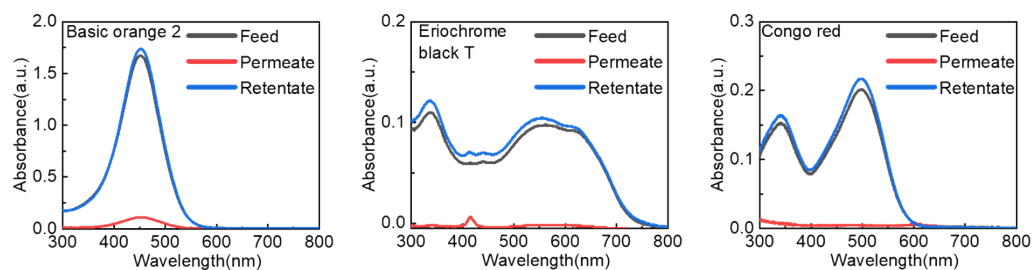

**Figure S18.** UV-vis absorption spectra of dyes solutions before and after filtration through the Cu-TCPP-

DA membrane.

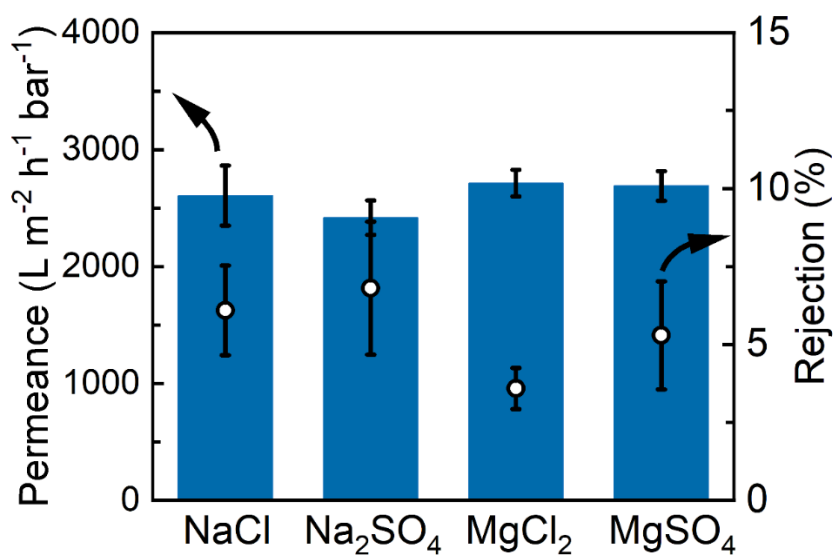

**Figure S19.** Permeation and rejection performances of Cu-TCPP-DA membranes for different inorganic salts.

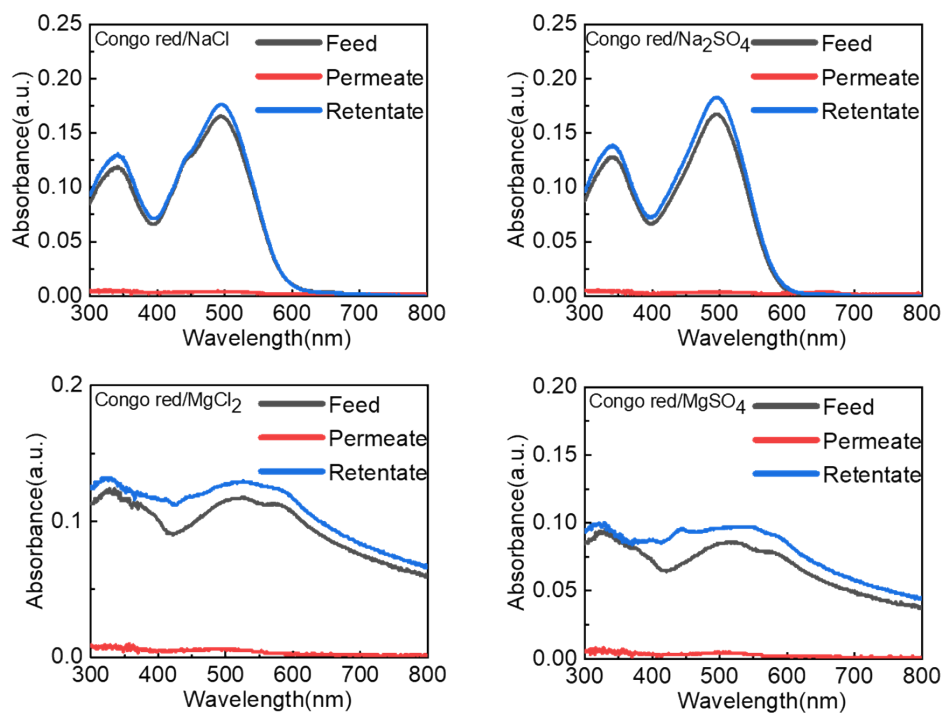

**Figure S20.** UV-vis absorption spectra of congo red/various salts solutions before and after filtration

through the Cu-TCPP-DA membrane.

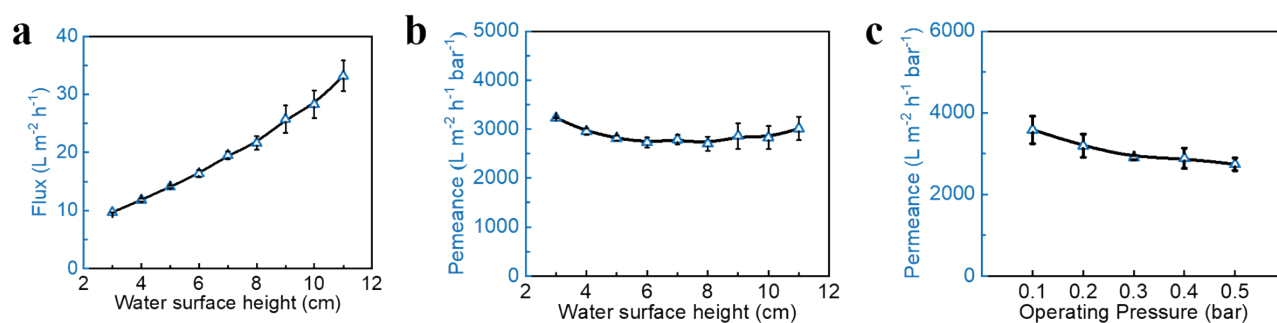

**Figure S21.** a) Water flux and b) permeance versus water surface height plot of the Cu-TCPP-DA membrane. b) Water permeance versus operating pressure plot of the Cu-TCPP-DA membrane.

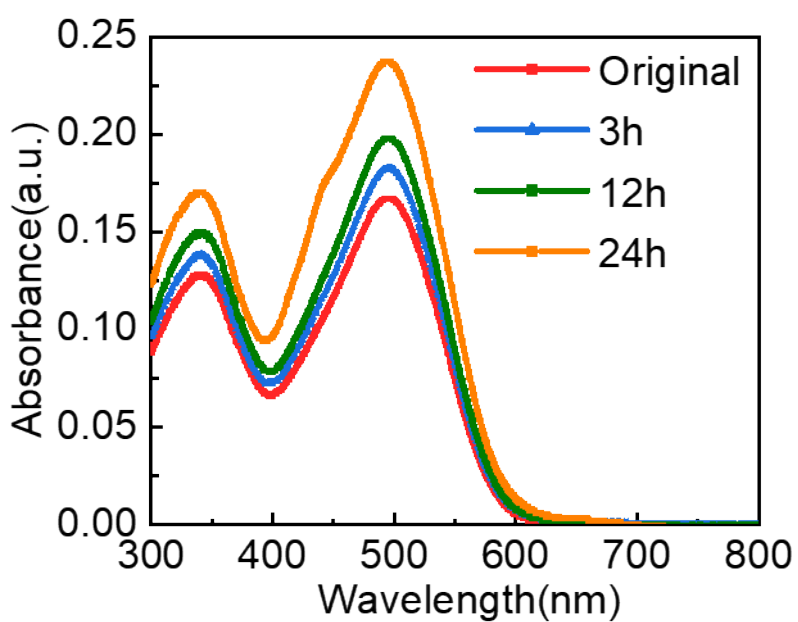

**Figure S22.** UV-vis absorption spectra of Congo red in the retentate side solution with time during a long-time desalination filtration test.

**Table S1.** Dyes and neutral molecules details

| Name               | Molecular weight (g/mol) | Electric charge | Ultraviolet absorption wavelength (nm) |
|--------------------|--------------------------|-----------------|----------------------------------------|
| Isatin             | 147.13                   | 0               | 297                                    |
| Basic orange 2     | 248.71                   | 0               | 469                                    |
| Eriochrome black T | 461.38                   | -               | 336                                    |
| Congo red          | 696.66                   | -               | 488                                    |

**Table S2.** Comparison of permeance and separation performance of the Cu-TCPP-DA 2D lamellar membrane and various membranes.

| Membrane                             | Permeance | M <sub>w</sub> | Solute/Rejection (%)    | Ref.      |
|--------------------------------------|-----------|----------------|-------------------------|-----------|
| uGNMS                                | 21.8      | 319.9          | MnB/99.2                | 1         |
| Nematic GO                           | 63-67     | 269.3          | MR/90                   | 2         |
| GO/MCNT                              | 52.7      | 350.3          | AO-7/99.4               | 3         |
| Nanostrand channeled GO              | 568       | 884.9          | CC/98                   | 4         |
| GO/SWCNT                             | 720       | 792.9          | BB/98.6                 | 5         |
| Nanostrand channeled WS <sub>2</sub> | 704-747   | 884.9          | CC/91                   | 6         |
| MOS <sub>2</sub>                     | 245       | 884.9          | CC/98                   | 7         |
| g-alumina                            | 24.8      | 1000           | PEG-1000/91             | 8         |
| ZIF-8 on PES                         | 37.5      | 1017.6         | RB/98                   | 9         |
| GO/MXene                             | 71.9      | 799.8          | MB/99.5                 | 10        |
| PGO                                  | 18.5      | 799.8          | MB/99.8                 | 11        |
| GO                                   | 71        | 960.8          | EB/85                   | 12        |
| MXene                                | 1084      | 960.8          | EB/90                   | 13        |
| Cu-TCPP-DA                           | 2536      | 248.7          | basic orange 2/<br>98.8 | This work |

## References

1. Y. Han, Z. Xu and C. Gao, *Adv. Funct. Mater.*, 2013, **23**, 3693-3700.
2. A. Akbari, P. Sheath, S. T. Martin, D. B. Shinde, M. Shaibani, P. C. Banerjee, R. Tkacz, D. Bhattacharyya and M. Majumder, *Nat. Commun.*, 2016, **7**, 10891.
3. K. Goh, W. C. Jiang, H. E. Karahan, S. L. Zhai, L. Wei, D. S. Yu, A. G. Fane, R. Wang and Y. Chen, *Adv. Funct. Mater.*, 2015, **25**, 7348-7359.
4. H. Huang, Z. Song, N. Wei, L. Shi, Y. Mao, Y. Ying, L. Sun, Z. Xu and X. Peng, *Nat. Commun.*, 2013, **4**, 2979.
5. S. J. Gao, H. Qin, P. Liu and J. Jin, *J. Mater. Chem. A.*, 2015, **3**, 6649-6654.
6. L. Sun, Y. Ying, H. Huang, Z. Song, Y. Mao, Z. Xu and X. Peng, *ACS Nano*, 2014, **8**, 6304-6311.
7. L. Sun, H. Huang and X. Peng, *Chem. Commun. (Camb.)*, 2013, **49**, 10718-10720.
8. X. Chen, W. Zhang, Y. Lin, Y. Cai, M. Qiu and Y. Fan, *Micropor. Mesopor. Mat.*, 2015, **214**, 195-203.
9. Y. Li, L. H. Wee, J. A. Martens and I. F. J. Vankelecom, *J. Membrane. Sci.*, 2017, **523**, 561-566.
10. T. Liu, X. Liu, N. Graham, W. Yu and K. Sun, *J. Membrane. Sci.*, 2020, **593**.
11. Y. Xu, M. Wu, S. Yu, Y. Zhao, C. Gao and J. Shen, *J. Membrane. Sci.*, 2019, **586**, 15-22.
12. H. Huang, Y. Mao, Y. Ying, Y. Liu, L. Sun and X. Peng, *Chem. Commun. (Camb.)*, 2013, **49**, 5963-5965.
13. L. Ding, Y. Wei, Y. Wang, H. Chen, J. Caro and H. Wang, *Angew Chem. Int. Ed. Engl.*, 2017, **56**, 1825-1829.
